# Supplementary material for: Co-Existence of Iron Oxide Nanoparticles and Manganese Oxide Nanorods as Decoration of Hollow Carbon Spheres for Boosting Electrochemical Performance of Li-Ion Battery
Source: MDPI journal article supplement (doi:10.3390/ma14226902), 2021-11-15
Supplement: s1 [file s1]

Supplementary Materials

# Co-Existence of Iron Oxide Nanoparticles and Manganese Oxide Nanorods as Decoration of Hollow Carbon Spheres for Boosting Electrochemical Performance of Li-Ion Battery

Karolina Wenelska \*, Martyna Trukawka, Wojciech Kukulka, Xuecheng Chen and Ewa Mijowska

Department of Nanomaterials Physicochemistry, Faculty of Chemical Technology and Engineering, West Pomeranian University of Technology, Szczecin, Piastow Ave. 42, 71-065 Szczecin, Poland; mtrukawka@zut.edu.pl (M.T.); wkukulka@zut.edu.pl (W.K.); xchen@zut.edu.pl (X.C.); emijowska@zut.edu.pl (E.M.)

\* Correspondence: kwenelska@zut.edu.pl

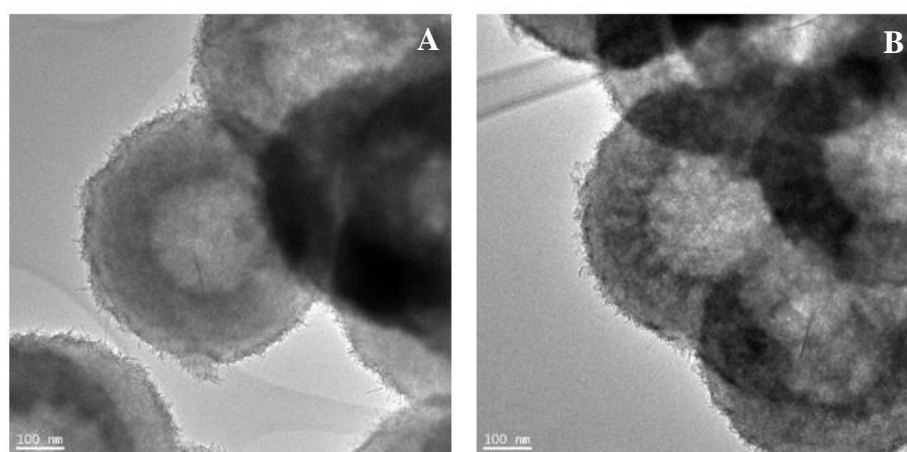

**Figure S1.** Transmission electron microscopy (A,B) images of MnO<sub>2</sub> rods on the hollow carbon spheres surface.

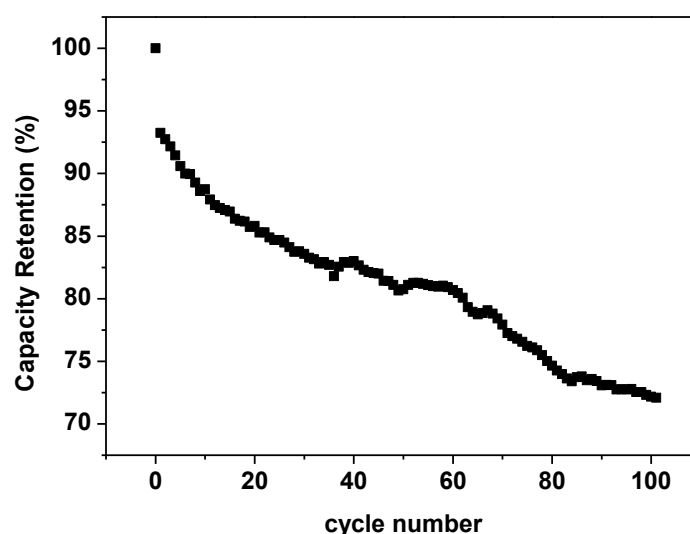

**Figure S2.** Cycling stability at 100 mA/g.
